# Supplementary material
Source: HighWire-hosted journal article supplement (https://bmjopen.bmj.com/content/13/7/e064758)

## Supplementary Figure 1. Risk of bias assessment

|                                             | Study ID               | Randomization process | Deviations from intended interventions | Missing outcome data | Measurement of the outcome | Selection of the reported result | Overall |   |
|---------------------------------------------|------------------------|-----------------------|----------------------------------------|----------------------|----------------------------|----------------------------------|---------|---|
| <b>Studies with intention-to-treat</b>      | Saban et al. 2022      | ?                     | +                                      | ?                    | +                          | +                                | !       | + |
|                                             | Seppala et al. 2014    | ?                     | ?                                      | +                    | +                          | +                                | !       | ? |
|                                             | Taylor et al. 2020     | ?                     | ?                                      | +                    | +                          | +                                | !       | - |
| <b>Studies with available case analysis</b> | Kelly and Garland 2016 | ?                     | +                                      | ?                    | +                          | +                                | !       |   |

 Low risk  
 Some concerns  
 High risk

**Supplementary Figure 2. Funnel plot of publication bias**

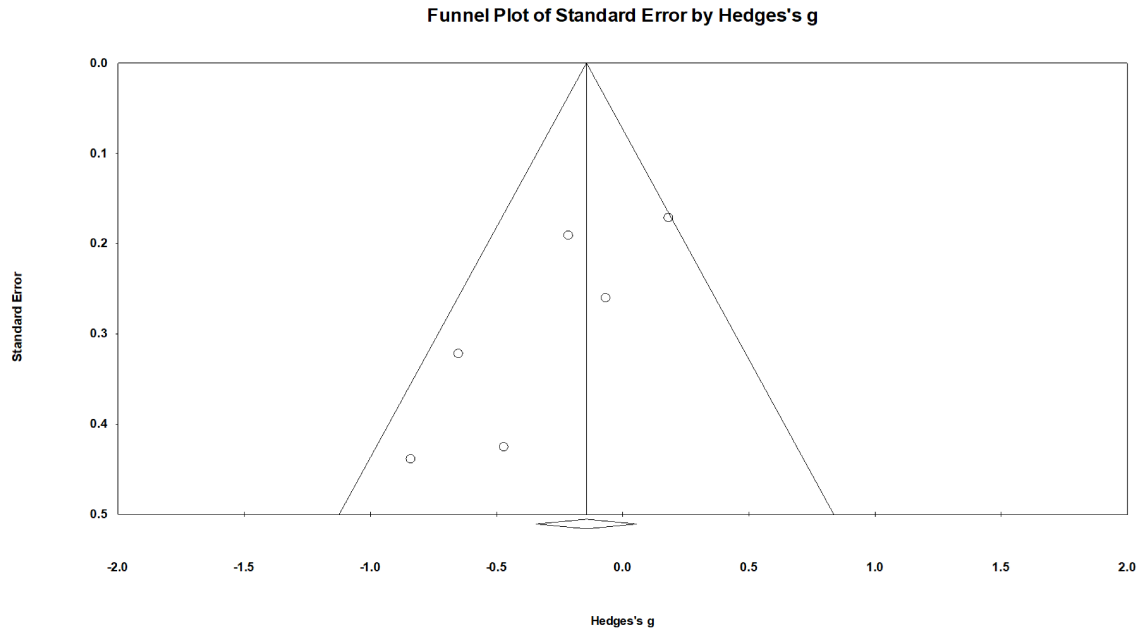

Supplement: inline-supplementary-material-2 [file inline-supplementary-material-2.pdf]
